# Supplementary material for: B Cell Response Induced by SARS-CoV-2 Infection Is Boosted by the BNT162b2 Vaccine in Primary Antibody Deficiencies
Source: MDPI journal article supplement (doi:10.3390/cells10112915), 2021-10-27
Supplement: s1 [file s1]

**Supplemental information. Figure S1. Gating strategy to identify S+ and S++ MBCs and ATMs.** Flow cytometry plots showing the staining patterns of SARS-CoV-2 antigen probes in MBCs (identified as CD24+CD27+CD38-) and ATMs (identified as CD24-CD27-CD38-CD21-) populations in one HD and one CVID subjects. S+ are B cells Spike-PE+, but Spike-BUV395-; S++ are instead Spike-PE+ and Spike-BUV395+. The color code identifies Spike+ and Spike++ in MBCs (blue) and ATMs (pink).

#### Healthy control

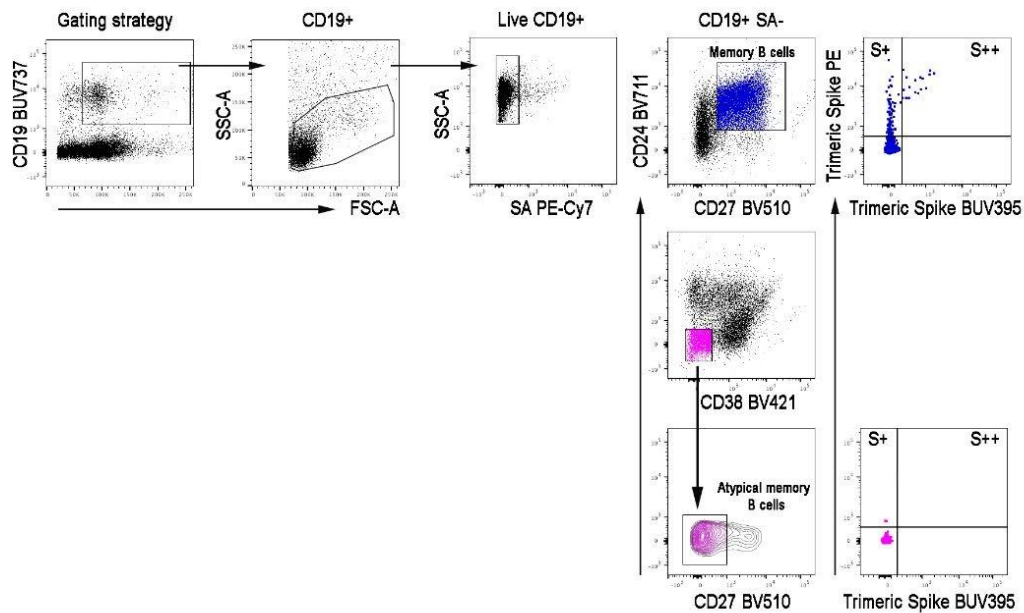

#### CVID patient

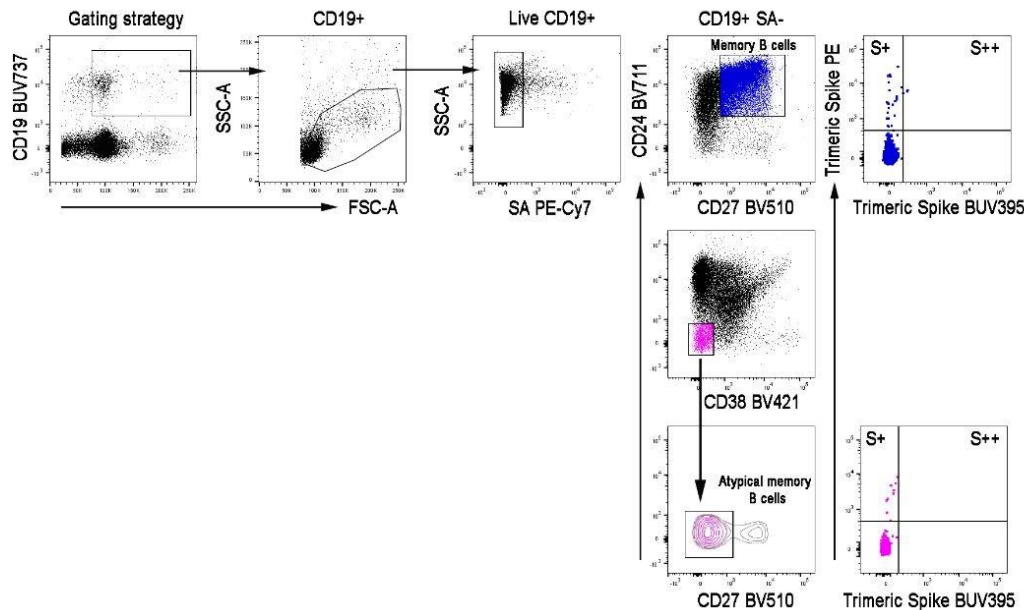

**Figure S2. Spike-specific memory B cell subsets in the healthy cohort.** Spike-specific MBCs (A) and ATMs (B) data are shown at BL ( $n=28$ ), after immunization (immunized,  $n=28$ ), and after immunization in SARS-CoV-2 convalescents (convalescent/immunized,  $n=9$ ). Medians are plotted as horizontal bars. Levels of significance by Wilcoxon matched-pairs signed-rank test or two-tailed Mann–Whitney U-test: \*\*\*\*  $p<0.0001$ , \*\*\*  $p<0.001$ , \*\*  $p<0.01$ .

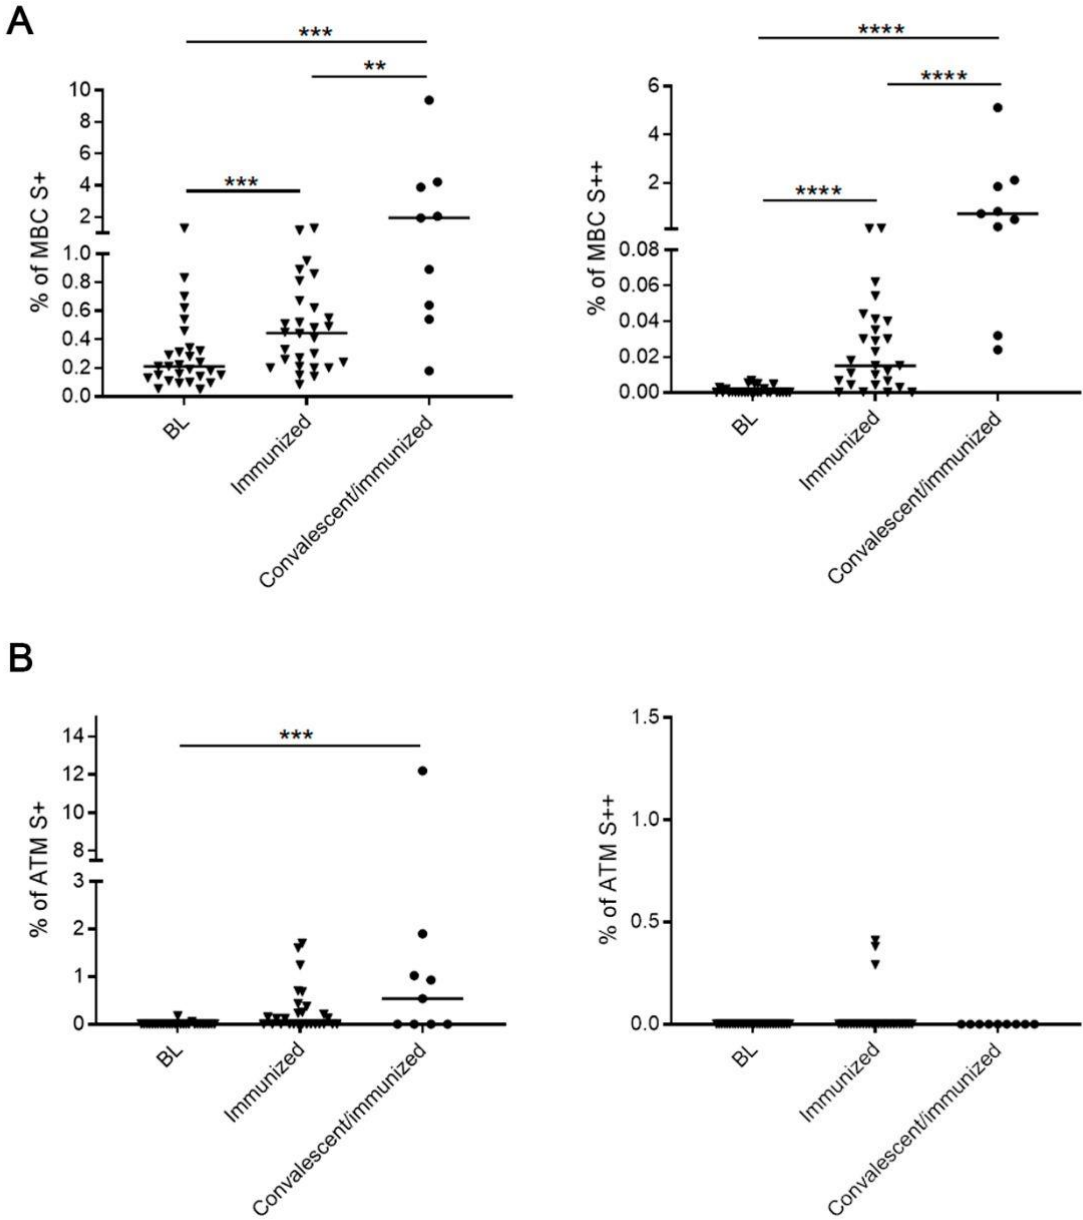

**Table S1.** Demographic, clinical and immunological characteristics of CVID enrolled, stratified by antibody response to a two-dose of mRNA vaccine or to natural infection. Responders are defined as having IgG S1 antibodies serum levels >1.1 OD ratio.

|                                                  | Immunized CVID         |                        |         | Convalescence CVID    |                          |         |
|--------------------------------------------------|------------------------|------------------------|---------|-----------------------|--------------------------|---------|
|                                                  | Non responders<br>n=24 | Responders<br>n=14     | p value | Non responders<br>n=5 | Responders<br>n=24       | p value |
| <b>Demographics</b>                              |                        |                        |         |                       |                          |         |
| SEX, n (%)                                       | 17 (70%)               | 8 (57%)                | 0,486   | 3 (60)                | 11 (48)                  | 0,651   |
| Age, median (IQR)                                | 52 (45,5-59,2)         | 54,5 (37,5-61,2)       | 0,944   | 55 (49-56)            | 48 (41-54)               | 0,451   |
| <b>PAD-related conditions</b>                    |                        |                        |         |                       |                          |         |
| Autoimmunity, n (%)                              | 13 (54%)               | 5 (36%)                | 0,328   | 3 (60)                | 7 (29)                   | 0,306   |
| CLD, n (%)                                       | 5 (21%)                | 3 (21%)                | 1,000   | 2 (40)                | 13 (57)                  | 0,651   |
| Cancer, n (%)                                    | 2 (8%)                 | 0 (0%)                 | 0,522   | 1 (20)                | 1 (5)                    | 0,342   |
| Immuno-suppressive treatment, n (%)              | 7 (29%)                | 3 (21%)                | 0,715   | 0(0)                  | 3 (14)                   | 1,000   |
| <b>Serum Ig level and immunophenotype</b>        |                        |                        |         |                       |                          |         |
| IgA (mg/dl), median (IQR)                        | 4 (0-10)               | 25 (16-36)             | 0,0002  | 6 (0-42)              | 7 (0-42)                 | 0,261   |
| IgM (mg/dl), median (IQR)                        | 13 (0-31,6)            | 36,6 (18-52)           | 0,042   | 24 (8,5-47,75)        | 25 (20,25-47,75)         | 0,283   |
| CD3+ (cell/mm3), median (IQR)                    | 924 (756,5-1387,5)     | 1029,5(844,70-1298,25) | 0,780   | 917,5 (630-1447,2)    | 938 (765-1447,20)        | 0,455   |
| CD4+ (cell/mm3), median (IQR)                    | 452 (385,9-671,95)     | 490 (418,72-653,5)     | 0,362   | 509,60 (330-838,50)   | 540,20 (400,75 - 838,50) | 0,455   |
| CD8+ (cell/mm3), median (IQR)                    | 418(195-741)           | 468,4 (341,42-592,5)   | 0,470   | 346 (243,60-533,40)   | 322,50 (279,90 - 533,40) | 0,729   |
| CD19+ (cell/mm3), median (IQR)                   | 87,2(21-186,15)        | 81,8 (19,72-175,75)    | 0,877   | 76,30 (33,60-131)     | 91,50 (31,20-131)        | 0,266   |
| CD27-IgM+IgD+ (%CD19+), median (IQR)             | 54(47-76)              | 55 (54-60)             | 0,978   | 27,5 (0,30-47,75)     | 36,50 (13,25-47,75)      | 0,180   |
| CD27-IgM+IgD+ (cell/mm3), median (IQR)           | 51,8 (13-97,056)       | 43,3 (16,3-89,2)       | 0,492   | 10,21 (0,48 - 33,01)  | 13,76 (8,69-33,01)       | 0,245   |
| CD27+IgM-IgD- (%CD19+), median (IQR)             | 1,1 (0,25-5)           | 15 (7,5-15,7)          | 0,0005  | 2,5 (0-5,50)          | 3 (0,65 - 5,50)          | 0,436   |
| CD27+IgM-IgD-(cell/mm3), median (IQR)            | 1 (0-2)                | 9,0 (1,9-17,5)         | 0,025   | 2,32 (0-5,39)         | 3,10 (0,67-5,39)         | 0,184   |
| <b>Specific immune response to Spike protein</b> |                        |                        |         |                       |                          |         |
| IgG S+, OD ratio, median (IQR)                   | 0,20 (0,0-0,26)        | 5,5 (3,5-7,2)          | <0,0001 | 2,65 (0-4,74)         | 2,85 (1,8 - 4,7)         | 0,011   |
| S+MBCs (%), median (IQR)                         | 0,04 (0-15)            | 0 (0-0,07)             | 0,310   | 0,20 (0,15-0,28)      | 0,13 (0,02-0,20)         | 0,246   |
| S+ATMs (%), median (IQR)                         | 0 (0-0,07)             | 0,06 (0-0,38)          | 0,280   | 0,08 (0,04-0,18)      | 0 (0-0)                  | 0,065   |
| <b>COVID-19</b>                                  |                        |                        |         |                       |                          |         |
| Days of SARS-CoV-2 qPCR positivity               | NAp                    | NAp                    | NAp     | 10 (9-12)             | 30 (22.5-52)             | 0,073   |
| Severe/moderate COVID19                          | NAp                    | NAp                    | NAp     | 2 (40)                | 7 (29)                   | 0,633   |
| Pneumonia                                        | NAp                    | NAp                    | NAp     | 2 (40)                | 3 (14)                   | 0,195   |

Abbreviation CLD chronic lung disease, IQR interquartile range, S+ MBC memory B-cells, S+ ATM Atypical Memory B cells.
